# Supplementary material
Source: Springer Nature journal article supplement (https://www.springermedizin.de/resource/supplementary/13075_2011_3202_MOESM9_ESM.pdf/9693998)

Figure 5C

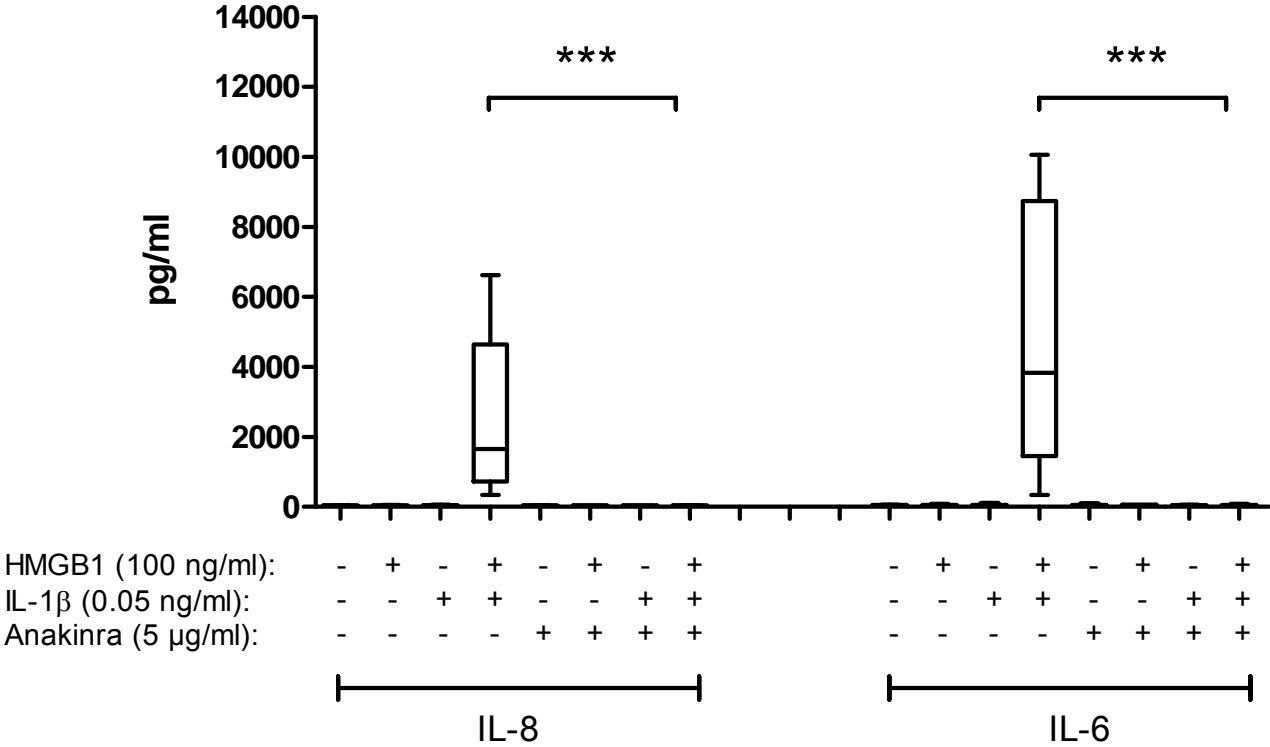

Supplement: MOESM9 [file 9693998]
